# Supplementary material for: Evaluating the Role of Janus Kinase Pathways in Platelet Homeostasis Using a Systems Modeling Approach
Source: PubMed Central journal article supplement — CPT Pharmacometrics Syst Pharmacol. 2019 Jun 25;8(7):478–88. doi: 10.1002/psp4.12419 (PMC6656939; doi:10.1002/psp4.12419), 2019-06-25
Supplement: PSP4-8-478-s003.pdf [file PSP4-8-478-s003.pdf]

**Table S1: List of model parameters and initial conditions**

| Name                      | Interpretation                                                  | Value  | Units             | Reference* |
|---------------------------|-----------------------------------------------------------------|--------|-------------------|------------|
| <b>basal<sub>T</sub></b>  | Basal rate of TPO production                                    | 0.23   | ng/(ml day)       | 15,16      |
| <b>kP<sub>J2</sub></b>    | Maximum rate of TPO production via JAK2 pathway                 | 0.01   | ng/(ml day)       | 8          |
| <b>K</b>                  | Aged platelet concentration for half maximal uptake             | 47     | nl <sup>-1</sup>  | 8          |
| <b>γ</b>                  | Hill coefficient for aged platelet uptake by AMR                | 2      |                   | Fixed      |
| <b>kP<sub>J1</sub></b>    | Max rate of TPO production via JAK1 pathway                     | 0.03   | nl <sup>-1</sup>  | 9,10       |
| <b>K<sub>J1</sub></b>     | IL-6 concentration for half maximal TPO production              | 0.3    | ng/ml             | 9,10       |
| <b>k<sub>T1</sub></b>     | TPO transit rate constant from liver to blood compartment       | 7.1    | day <sup>-1</sup> | Fit        |
| <b>d<sub>TB</sub></b>     | TPO decay rate constant in blood                                | 0.25   | day <sup>-1</sup> | 13,14      |
| <b>d<sub>T</sub></b>      | TPO decay rate constant in liver                                | 0.005  | day <sup>-1</sup> | 13,14      |
| <b>d<sub>TBM</sub></b>    | TPO decay rate constant in bonemarrow                           | 0.05   | day <sup>-1</sup> | 13,14      |
| <b>k<sub>T2</sub></b>     | TPO transit rate constant from blood to bone marrow compartment | 0.34   | day <sup>-1</sup> | 15,16      |
| <b>k<sub>Tc</sub></b>     | Rate constant of TPO consumption by platelets                   | 0.15   | ng/day            | 11,12      |
| <b>K<sub>TP</sub></b>     | TPO concentration for half maximal consumption by platelets     | 3      | ng/ml             | 11,12      |
| <b>β</b>                  | Hill coefficient for TPO consumption                            | 2      |                   | Fixed      |
| <b>w<sub>T</sub></b>      | Fraction of aged platelets consuming TPO                        | 0.06   |                   | Fixed      |
| <b>k<sub>TcM</sub></b>    | Rate constant of TPO consumption by precursors                  | 0.5    | ng/day            | 11,12      |
| <b>K<sub>TM</sub></b>     | TPO concentration for half maximal consumption by precursors    | 0.04   | ng/ml             | 11,12      |
| <b>f</b>                  | Fraction of precursors consuming TPO                            | 0.1    |                   | Fixed      |
| <b>basal<sub>MB</sub></b> | Basal rate of megakaryoblast (MB) production from stem cells    | 0.05   | 1/(nl day)        | Fit        |
| <b>g<sub>J1</sub></b>     | Max rate of MB production through JAK1 pathway                  | 0.06   | 1/(nl day)        | 1,2        |
| <b>K<sub>BJ1</sub></b>    | IL-6 concentration for half maximal MB production               | 0.1    | ng/ml             | 1,2        |
| <b>g<sub>J2</sub></b>     | Max rate of MB production through JAK2 pathway                  | 0.2    | 1/(nl day)        | 1,2        |
| <b>K<sub>BJ2</sub></b>    | TPO concentration for half maximal MB production                | 0.12   | ng/ml             | 1,2        |
| <b>α</b>                  | Hill coefficient for MB production via JAK2 pathway             | 1      |                   | Fit        |
| <b>k<sub>MB</sub></b>     | MB transit rate constant                                        | 0.4    | day <sup>-1</sup> | 3,4        |
| <b>g<sub>MK</sub></b>     | MK proliferation rate constant                                  | 0.2    |                   | 7          |
| <b>Δ<sub>MK</sub></b>     | TPO concentration for half maximal MK proliferation             | 0.03   | ng/ml             | 7          |
| <b>δ</b>                  | Hill coefficient for MK proliferation                           | 2      |                   | Fixed      |
| <b>d<sub>MK</sub></b>     | MK decay rate constant                                          | 0.1325 | day <sup>-1</sup> | Fit        |
| <b>E<sub>max</sub></b>    | Rate constant of MK differentiation under the influence of TPO  | 1      |                   | Fixed      |
| <b>k<sub>MK</sub></b>     | Megakaryocyte(MK) transit rate constant                         | 0.5    | day <sup>-1</sup> | 4,5        |

|                            |                                                                    |       |                   |       |
|----------------------------|--------------------------------------------------------------------|-------|-------------------|-------|
| <b>k<sub>d</sub></b>       | MK differentiation rate constant                                   | 2     | day <sup>-1</sup> | 4,5   |
| <b>K<sub>BM</sub></b>      | TPO concentration for half maximal MK differentiation              | 0.09  | ng/ml             | 4-6   |
| <b>ε</b>                   | Hill coefficient for MK differentiation                            | 2     |                   | Fixed |
| <b>P<sub>MK</sub></b>      | Number of platelets produced per MK per day (corrected for volume) | 350   |                   | 4,5   |
| <b>dP<sub>aging</sub></b>  | Rate constant of platelet aging                                    | 0.4   | day <sup>-1</sup> | Fixed |
| <b>d<sub>AMR</sub></b>     | Rate of aged platelet uptake by hepatic AMR                        | 0.3   | 1/(nl day)        | 8     |
| <b>dP<sub>immune</sub></b> | Rate constant of immune clearance of platelets                     | 0.4   | day <sup>-1</sup> | 5,8   |
| <b>basal<sub>IL6</sub></b> | Basal rate of IL-6 production                                      | 0.01  | ng/(ml day)       | Fixed |
| <b>d<sub>IL6</sub></b>     | IL-6 decay rate constant                                           | 0.033 | day <sup>-1</sup> | Fixed |

| <b>Species category</b> | <b>Species names</b> | <b>Initial Values</b> | <b>Units</b> |
|-------------------------|----------------------|-----------------------|--------------|
| Megakaryoblasts         | MB,MB1,MB2           | 0.1,0.1,0.1           | cells/nl     |
| Megakaryocytes          | MK,MK1,MK2           | 0.25,0.25,0.25        | cells/nl     |
| Platelets               | Pnew, Paged          | 120,140               | cells/nl     |
| Thrombopoietin          | TL,TB,TBM            | 0.05,0.2,0.12         | ng/ml        |
| Interleukin             | IL-6                 | 0.3                   | ng/ml        |

\*These references are the sources for initial values of system parameters. Final estimates are obtained by optimizing to literature data.
